# Supplementary material for: Global, regional and national burden of cardiovascular disease in perimenopausal women: a systematic analysis of global burden of disease data and time trends
Source: Research Square preprint supplement (doi:10.21203/rs.3.rs-6842798/v1), 2025-06-12
Supplement: Supplementary file 1 [file e900b99453c86ab6b99e6edb.docx]

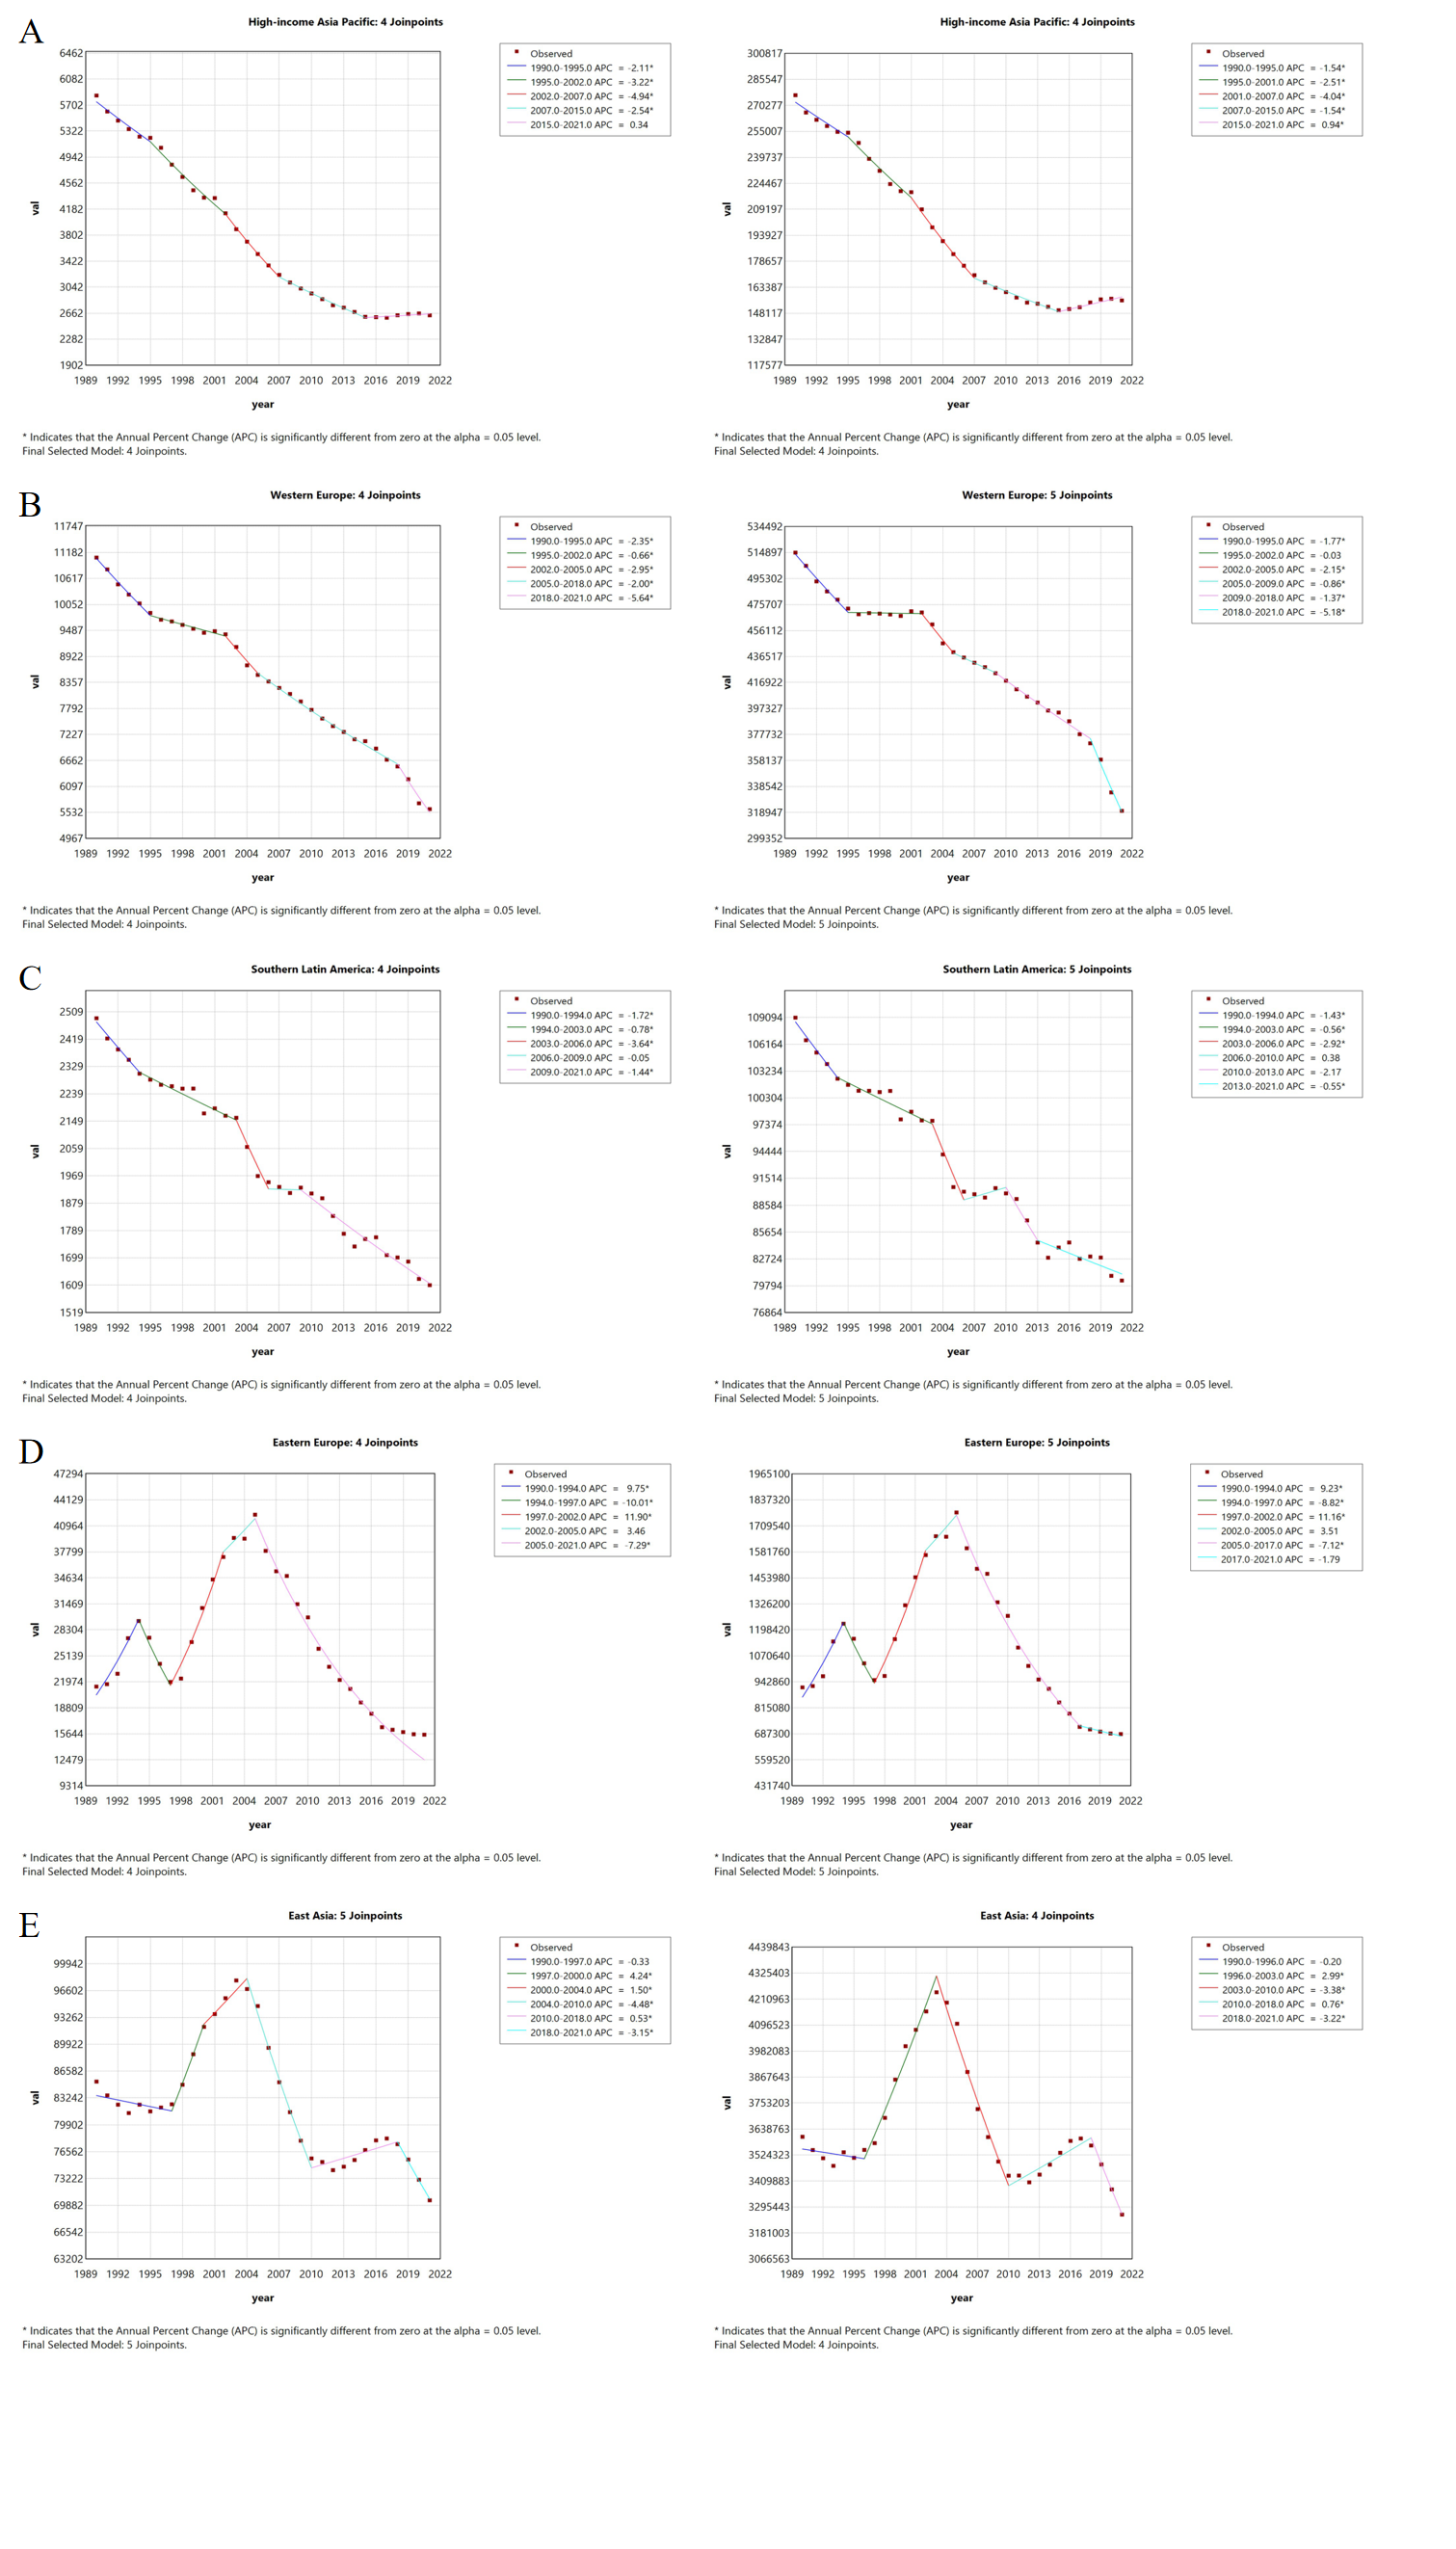


Figure S1 Trends in Deaths and DALYs of PMW-CVDs in Different Regions Globally, 1990-2021

(A)Trend of Deaths and DALYs of PMW-CVD in High-income Asia Pacific, 1990-2021

(B)Trends in Deaths and DALYs for Western Europe PMW-CVD, 1990-2021

(C)Trends in Deaths and DALYs for PMW-CVD in Southern Latin America, 1990-2021

(D)Trends in Deaths and DALYs for PMW-CVD in Eastern Europe, 1990-2021

(E)Trends in Deaths and DALYs for PMW-CVDs in East Asia, 1990-2021
